# Supplementary material for: Seratrodast platinum(iv) hybrids efficiently inhibit cancer-related thrombosis and metastasis phenotype in vitro and in vivo
Source: Royal Society of Chemistry journal article supplement (doi:10.1039/d3qi01328f), 2023-01-01
Supplement: d3qi01328f1.pdf [file d3qi01328f1.pdf]

**Seratrodist Platinum(IV) Hybrids Efficiently Inhibit Cancer-related  
Thrombosis and Metastasis Phenotype *In Vitro* and *In Vivo***

Xue-Qing Song<sup>†,\*</sup>, Yi-Xin Ding<sup>†</sup>, Yu-Hang Zhang, Qing Xu, Xiaofeng Xie, Yali Song,  
and Longfei Li\*

*College of Pharmacy, Key Laboratory of Pharmaceutical Quality Control of Hebei Province, Key  
Laboratory of Medicinal Chemistry and Molecular Diagnosis of Ministry of Education, Hebei  
University, Baoding 071002, Hebei, P. R. China.*

\*Corresponding author:

*E-mail address:* [sxqing@hbu.edu.cn](mailto:sxqing@hbu.edu.cn) (X.-Q. Song)

*E-mail address:* [lilongfei@hbu.edu.cn](mailto:lilongfei@hbu.edu.cn) (L.L.)

<sup>†</sup>These authors contributed equally.

## List of Contents Pages

|                                                                                                                                                                               |     |
|-------------------------------------------------------------------------------------------------------------------------------------------------------------------------------|-----|
| <b>Figure S1.</b> FTMS spectrum of <b>1</b> in methanol.                                                                                                                      | S4  |
| <b>Figure S2.</b> FTMS spectrum of <b>2</b> in methanol.                                                                                                                      | S4  |
| <b>Figure S3.</b> <sup>1</sup> H-NMR spectrum of <b>3</b> in DMSO- <i>d</i> <sub>6</sub> .                                                                                    | S5  |
| <b>Figure S4.</b> <sup>13</sup> C-NMR spectrum of <b>3</b> in DMSO- <i>d</i> <sub>6</sub> .                                                                                   | S5  |
| <b>Figure S5.</b> HRMS spectrum of <b>3</b> in methanol. The measured m/z is 670.1412 and the calculated m/z is 670.1414.                                                     | S6  |
| <b>Figure S6.</b> HPLC characterization of <b>3</b> .                                                                                                                         | S7  |
| <b>Figure S7.</b> <sup>1</sup> H-NMR spectrum of <b>4</b> in DMSO- <i>d</i> <sub>6</sub> .                                                                                    | S7  |
| <b>Figure S8.</b> <sup>13</sup> C-NMR spectrum of <b>4</b> in DMSO- <i>d</i> <sub>6</sub> .                                                                                   | S8  |
| <b>Figure S9.</b> HRMS spectrum of compound <b>4</b> in methanol. The measured m/z is 1006.3134 and the calculated m/z is 1006.3140.                                          | S8  |
| <b>Figure S10.</b> HPLC characterization of <b>4</b> .                                                                                                                        | S9  |
| <b>Figure S11.</b> <sup>1</sup> H-NMR spectrum of <b>5</b> in DMSO- <i>d</i> <sub>6</sub> .                                                                                   | S10 |
| <b>Figure S12.</b> <sup>13</sup> C-NMR spectrum of <b>5</b> in DMSO- <i>d</i> <sub>6</sub> .                                                                                  | S10 |
| <b>Figure S13.</b> HRMS spectrum of <b>5</b> in methanol. The measured m/z is 768.2466 and the calculated m/z is 768.2460.                                                    | S11 |
| <b>Figure S14.</b> HPLC characterization of <b>5</b> .                                                                                                                        | S12 |
| <b>Figure S15.</b> <sup>1</sup> H-NMR spectrum of <b>6</b> in DMSO- <i>d</i> <sub>6</sub> .                                                                                   | S12 |
| <b>Figure S16.</b> <sup>13</sup> C-NMR spectrum of <b>6</b> in DMSO- <i>d</i> <sub>6</sub> .                                                                                  | S13 |
| <b>Figure S17.</b> HRMS spectrum of <b>6</b> in methanol. The measured m/z is 1104.4181 and the calculated m/z is 1104.4185.                                                  | S13 |
| <b>Figure S18.</b> HPLC characterization of <b>6</b> .                                                                                                                        | S14 |
| <b>Figure S19.</b> The binding modes of SRT with TXA2R. The hydrogen interactions are in green dashed lines, the carbon hydrogen interactions are in forest dashed lines, and |     |

the Pi–Pi interactions and Pi–Cation interactions are in magenta dashed line. All the hydrogens are omitted except that on the heavy atoms that can form hydrogen bond interactions. The hydrophobic interactions are not presented. S15

**Figure S20.** Cyclic voltammograms of Pt(IV) complexes **3–6** recorded at a glassy carbon electrode in PBS buffer (DMF : PBS = 1:20, pH = 7.4) containing 0.1 M KCl as supporting electrolyte and 0.1 mM Pt(IV) complexes. S16

**Figure S21.** The HPLC of CDDP (a) and L-OHP (d) in DMSO. The reduction of compounds **3–6** with GSH in H<sub>2</sub>O at 37°C for 24 h in dark. (b) Compound **3**. (c) Compound **4**. (e) Compound **5**. (f) Compound **6**. S16

**Figure S22.** Stability of compounds **4–6** at 37°C in PBS/DMF (3:1, v:v, pH 7.4) for 0, 24, 48 and 72 h in dark. (a) Stability of compound **4**. (b) Stability of compound **5**. (c) Stability of compound **6**. S17

**Figure S23.** The reduction of compounds **4–6** with GSH in PBS at 37°C for 0, 6, 24 and 48 h in dark. (a) Reduction of compound **4**. (b) Reduction of compound **5**. (c) Reduction of compound **6**. S17

**Figure S24.** The reduction of compounds **4–6** with ASA in PBS at 37°C for 0, 6, 24 and 48 h in dark. (a) Reduction of compound **4**. (b) Reduction of compound **5**. (c) Reduction of compound **6**. S17

**Figure S25.** DNA contents were detected by flow cytometry. S18

**Figure S26.** (a) Fluorescent images of ROS detected by DFCH-DA probe in control and ROSup. (b) Statistics of fluorescence intensity. S18

**Figure S27.** Annexin V-FITC/PI double staining detected by flow cytometry (all 5 μM) for 48 h. S19

**Table S1.** Effects of compounds on clotting time. S19

## Figures and Tables

D:\DATA\20221012\17

10/12/22 14:09:41

7 #20-23 RT: 0.09-0.10 AV: 4 SB: 21 0.70-0.79 NL: 1.02E6  
T: FTMS + p ESI Full ms [105.0000-1500.0000]

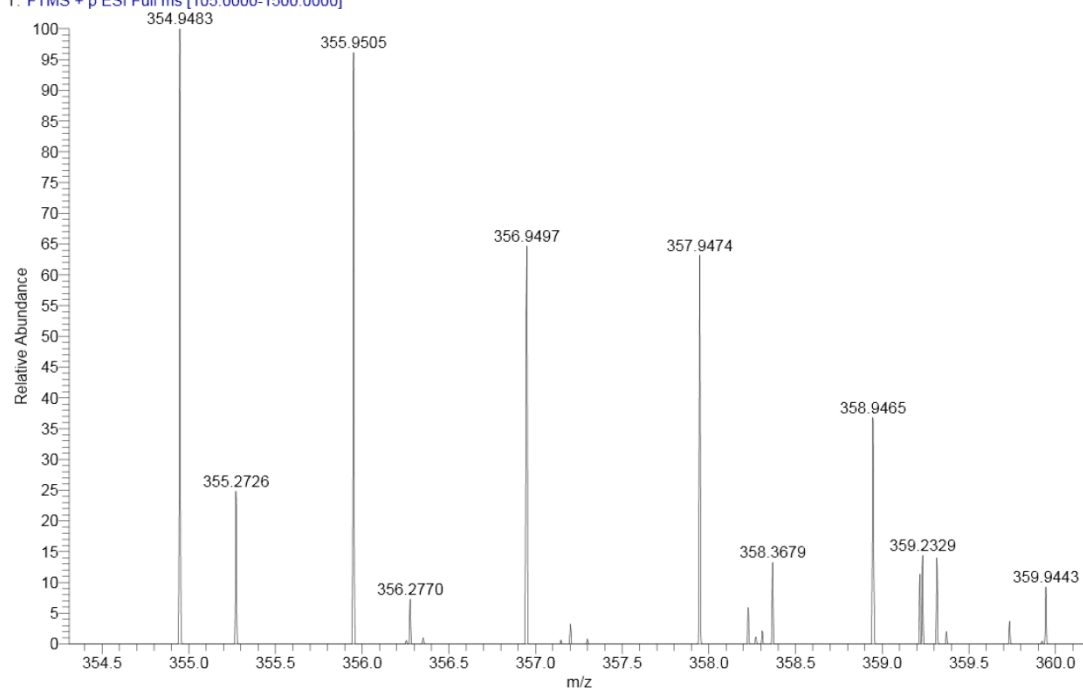

Figure S1. FTMS spectrum of 1 in methanol.

D:\DATA\20221012\16

10/12/22 14:07:41

6 #19-22 RT: 0.08-0.10 AV: 4 NL: 3.98E6  
T: FTMS + p ESI Full ms [105.0000-1500.0000]

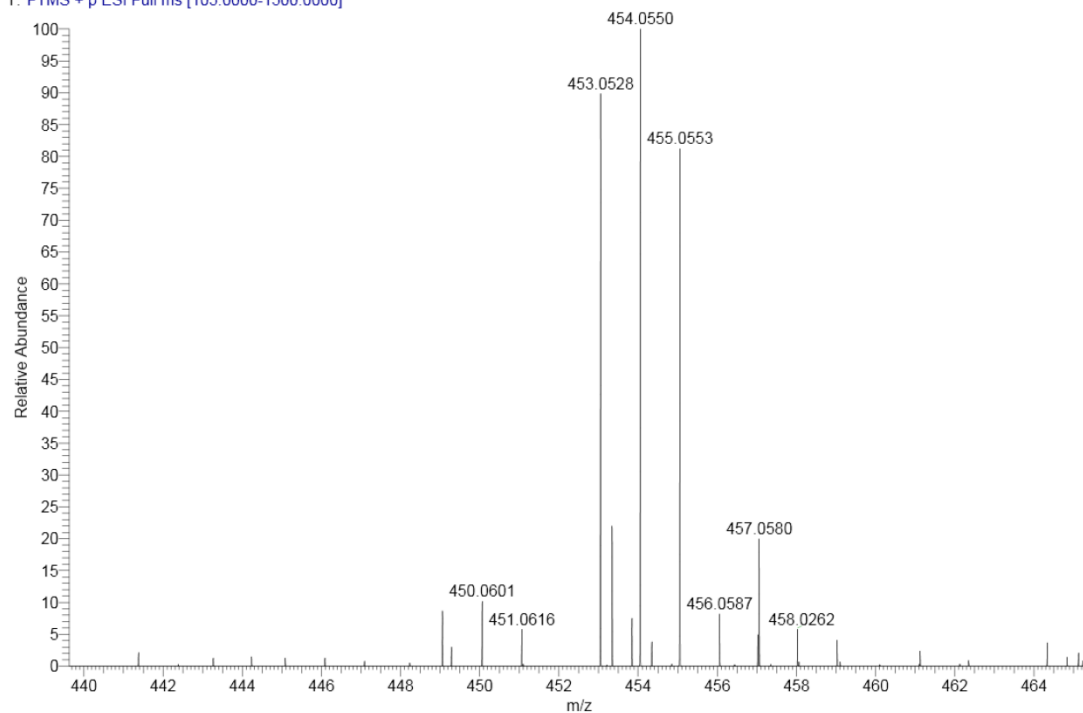

Figure S2. FTMS spectrum of 2 in methanol.

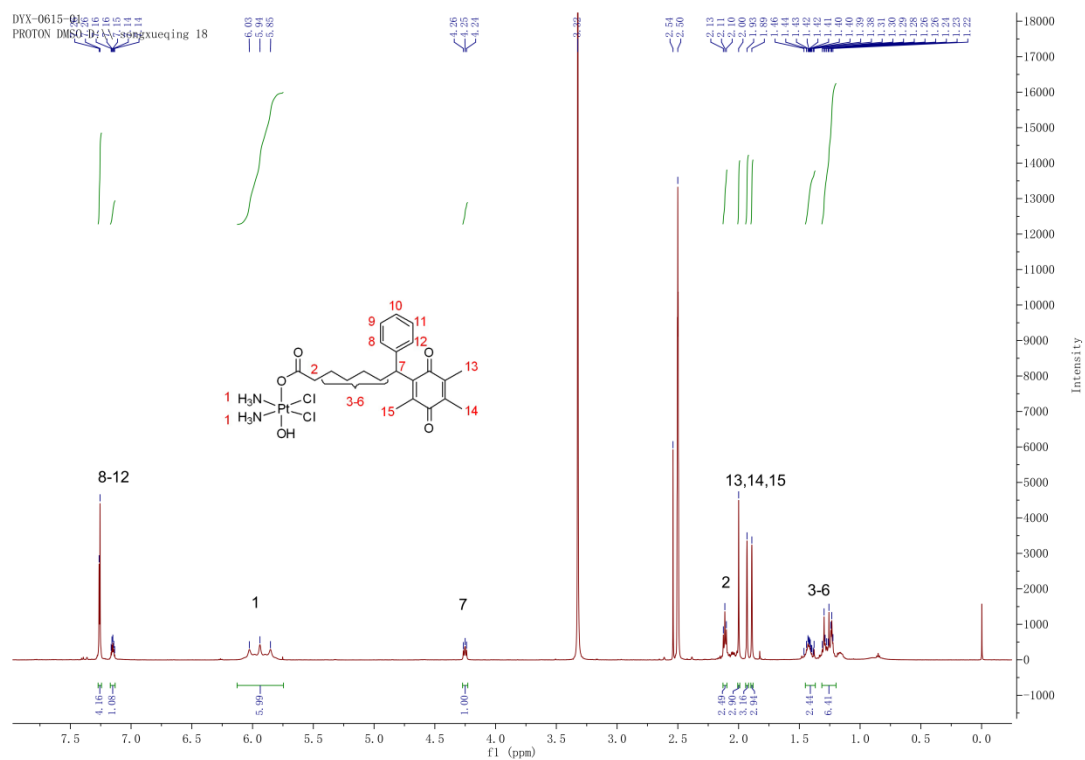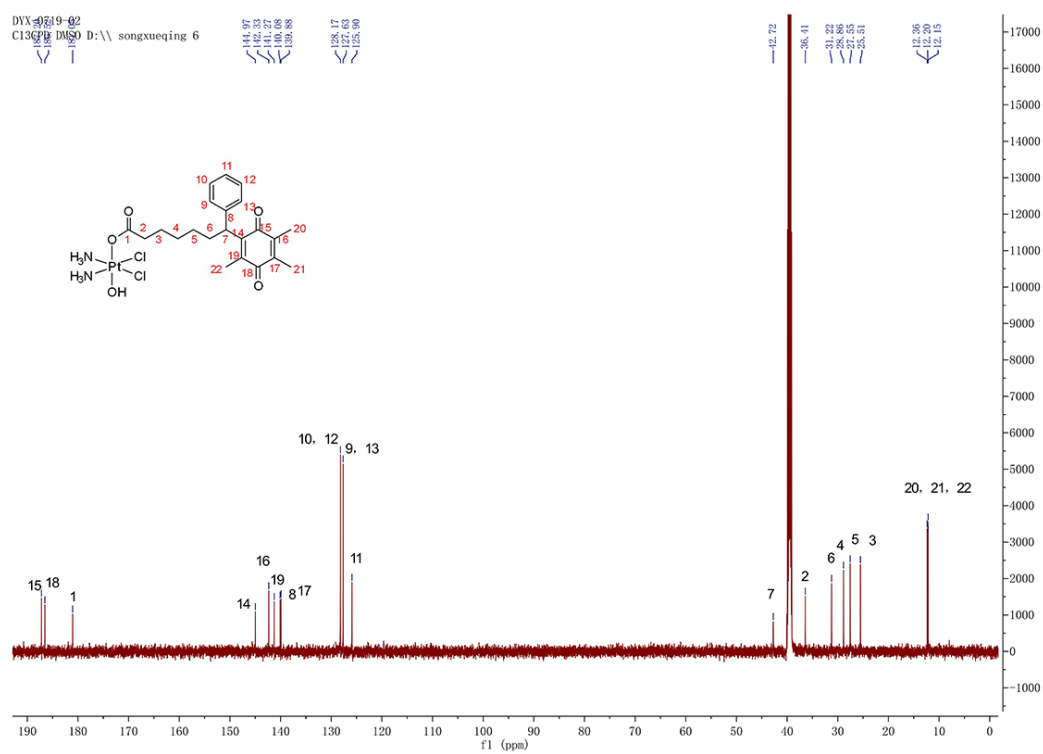

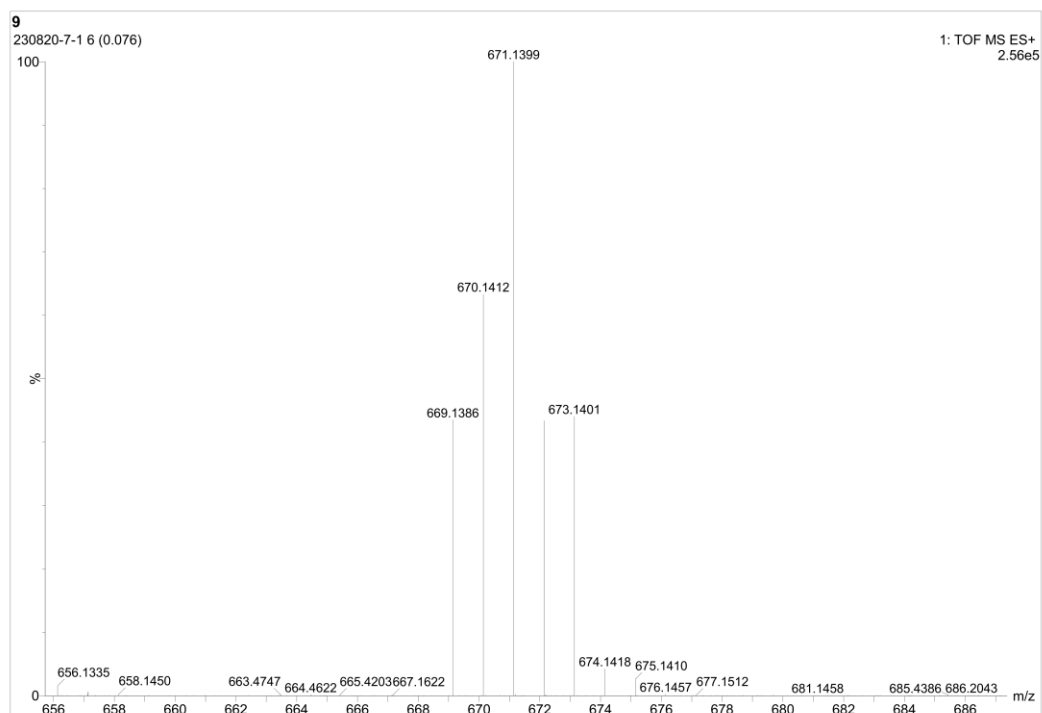

Monoisotopic Mass, Even Electron Ions  
1301 formula(e) evaluated with 1 results within limits (up to 50 closest results for each mass)  
Elements Used:  
C: 22-22 H: 33-33 N: 0-100 O: 0-100 Cl: 1-4 Pt: 1-1

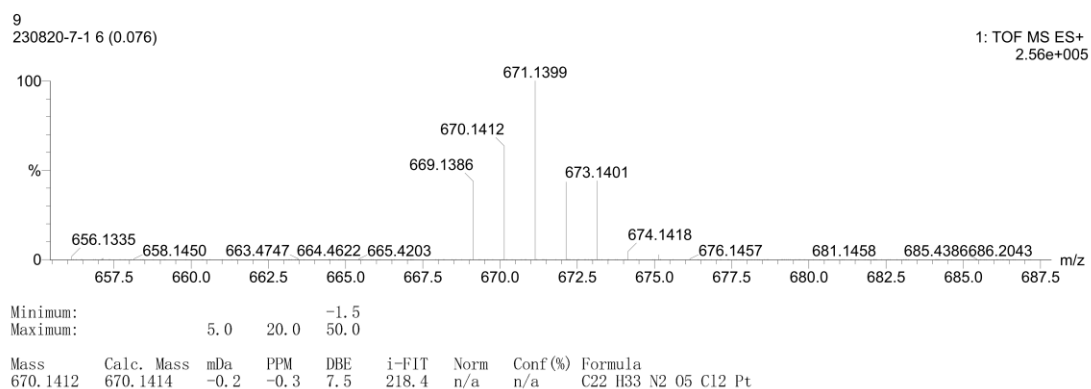

**Figure S5.** HRMS spectrum of **3** in methanol. The measured  $m/z$  is 670.1412 and the calculated  $m/z$  is 670.1414.

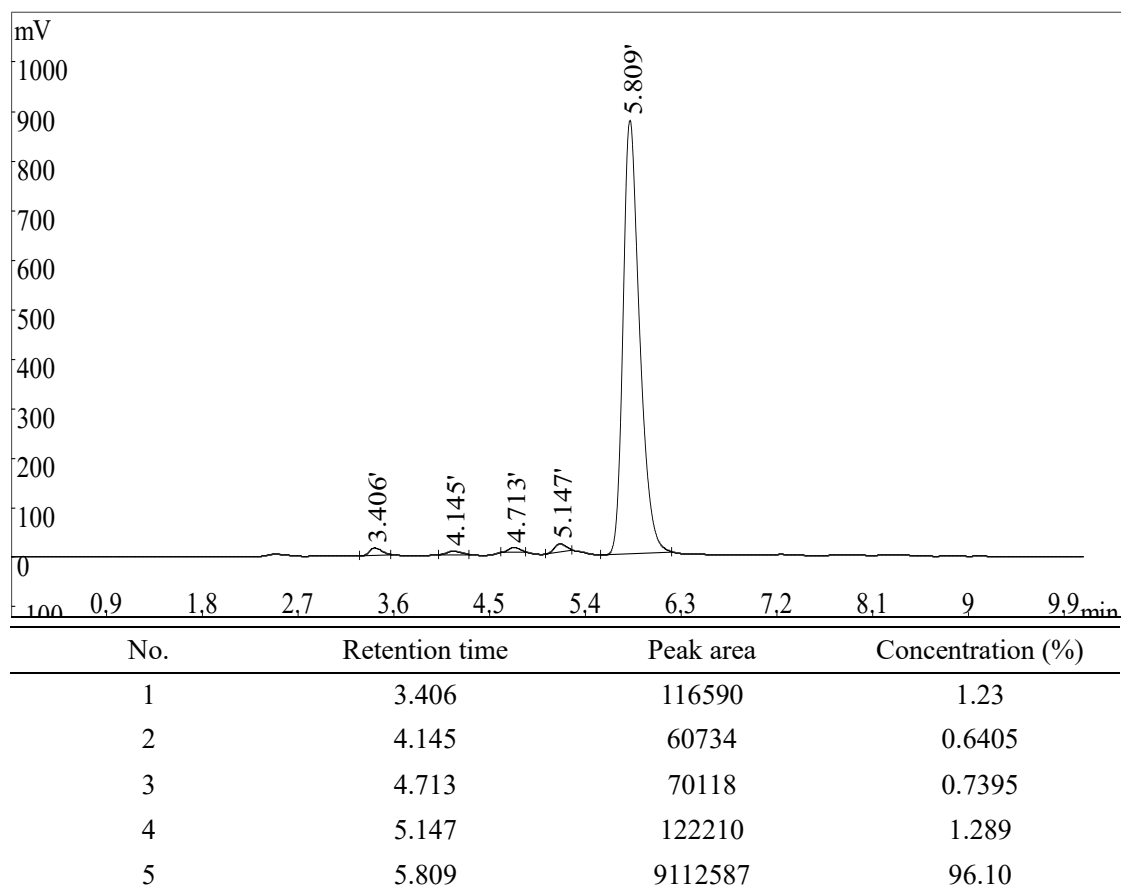

Figure S6. HPLC characterization of 3.

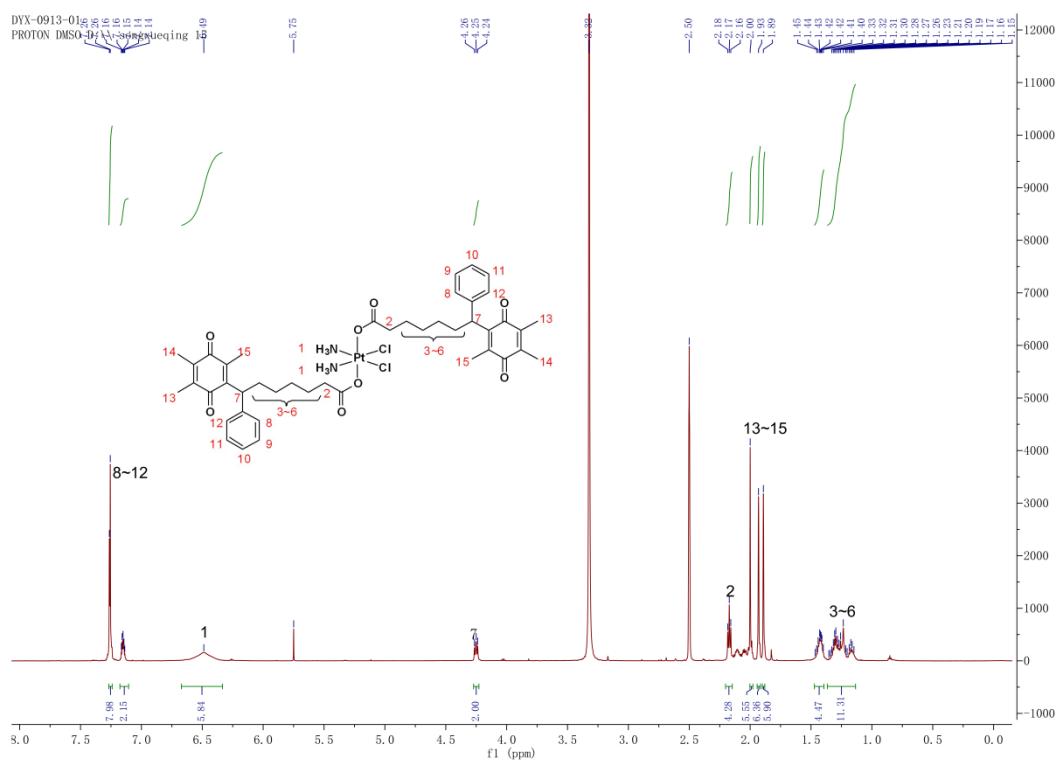

Figure S7.  $^1\text{H-NMR}$  spectrum of 4 in  $\text{DMSO-}d_6$ .

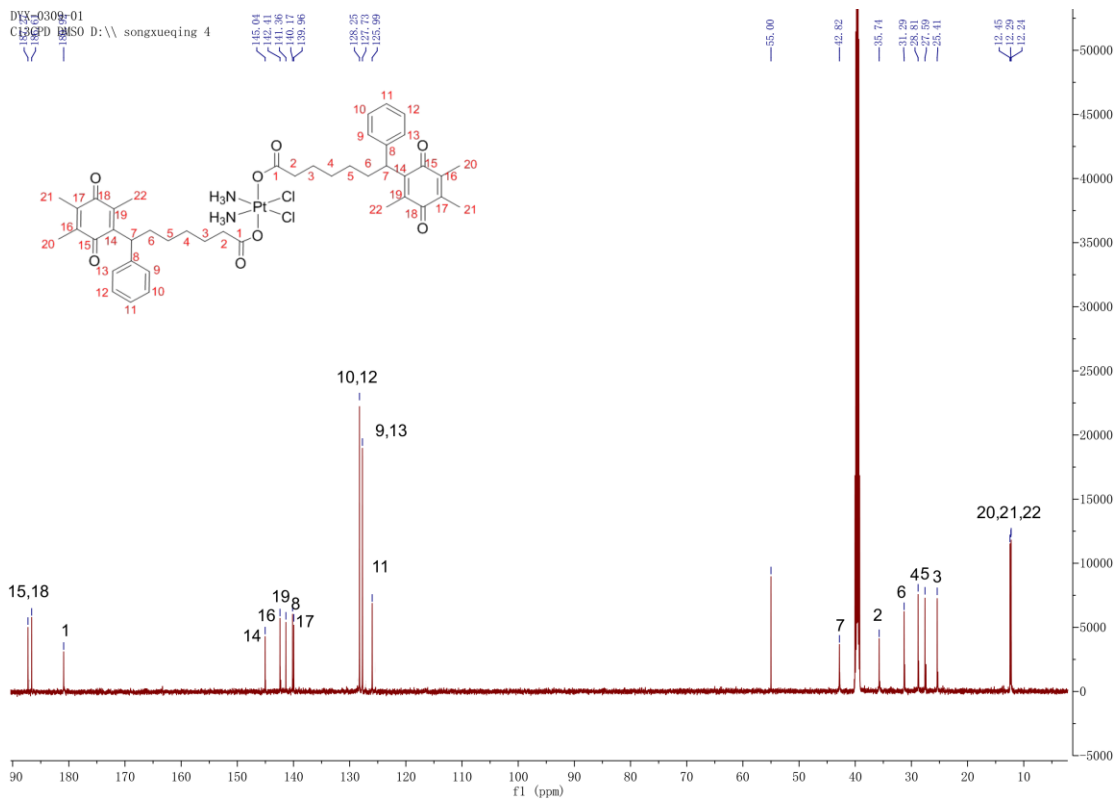

Figure S8.  $^{13}\text{C}$ -NMR spectrum of **4** in  $\text{DMSO-}d_6$ .

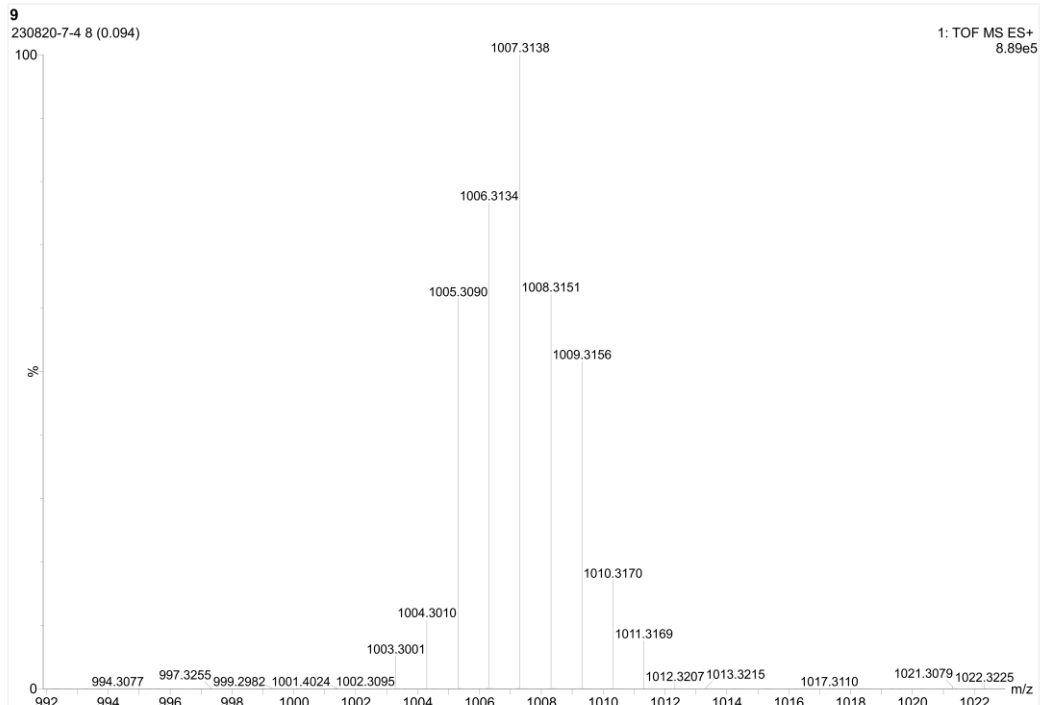



Monoisotopic Mass, Even Electron Ions  
 4501 formula(e) evaluated with 1 results within limits (up to 50 closest results for each mass)  
 Elements Used:  
 C: 44-44 H: 57-57 N: 0-100 O: 0-100 Cl: 1-4 Pt: 1-1

9  
 230820-7-4 8 (0.094)

1: TOF MS ES+  
 8.89e+005

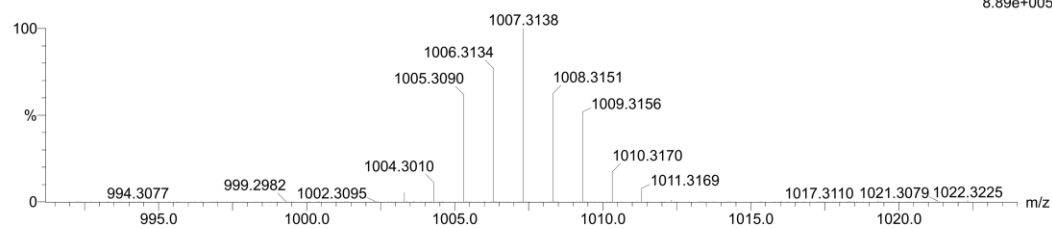

Minimum: -1.5  
 Maximum: 50.0

| Mass      | Calc. Mass | mDa  | PPM  | DBE  | i-FIT | Norm | Conf (%) | Formula              |
|-----------|------------|------|------|------|-------|------|----------|----------------------|
| 1006.3134 | 1006.3140  | -0.6 | -0.6 | 17.5 | 248.7 | n/a  | n/a      | C44 H57 N2 O8 Cl2 Pt |

**Figure S9.** HRMS spectrum of compound **4** in methanol. The measured  $m/z$  is 1006.3134 and the calculated  $m/z$  is 1006.3140.

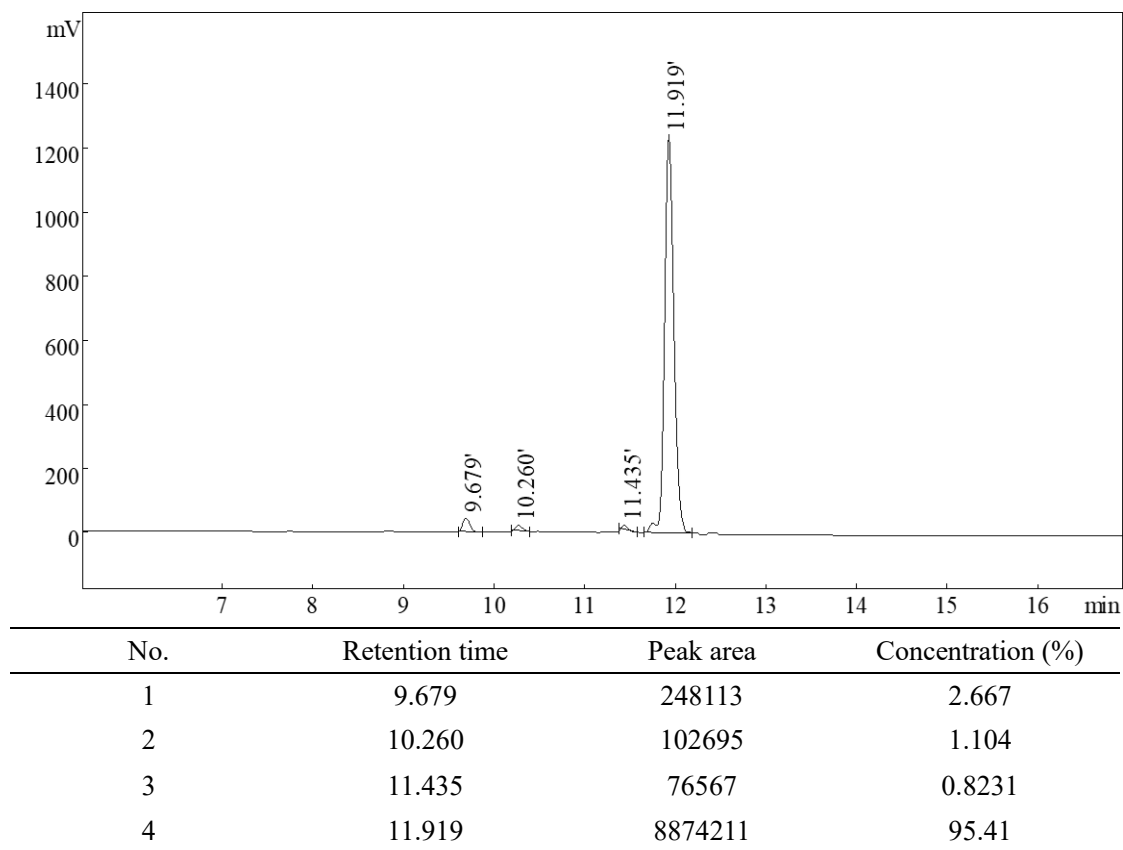

**Figure S10.** HPLC characterization of **4**.

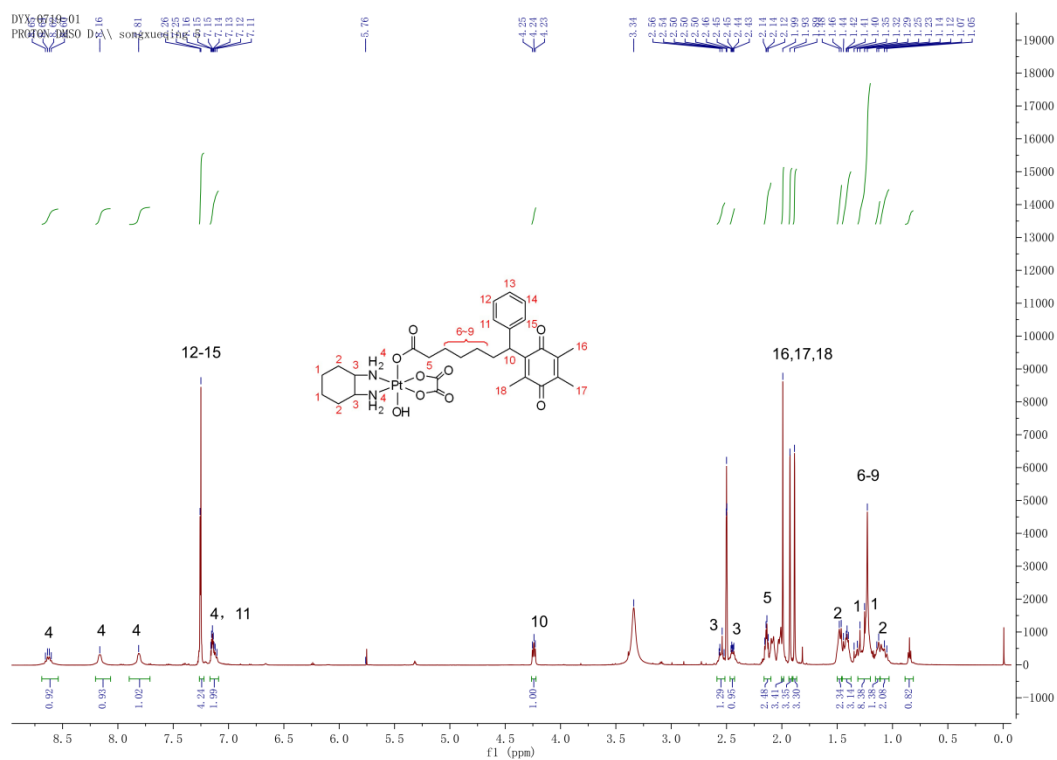

Figure S11.  $^1\text{H-NMR}$  spectrum of **5** in  $\text{DMSO-}d_6$ .

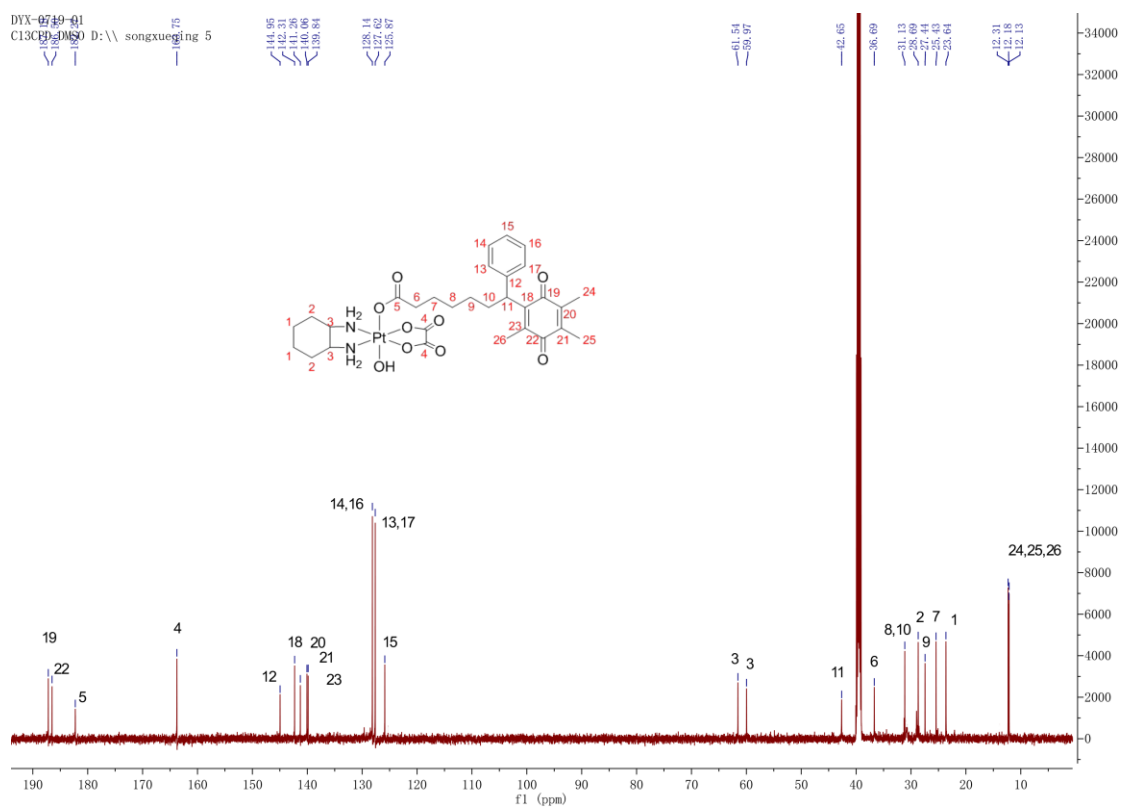

Figure S12.  $^{13}\text{C-NMR}$  spectrum of **5** in  $\text{DMSO-}d_6$ .

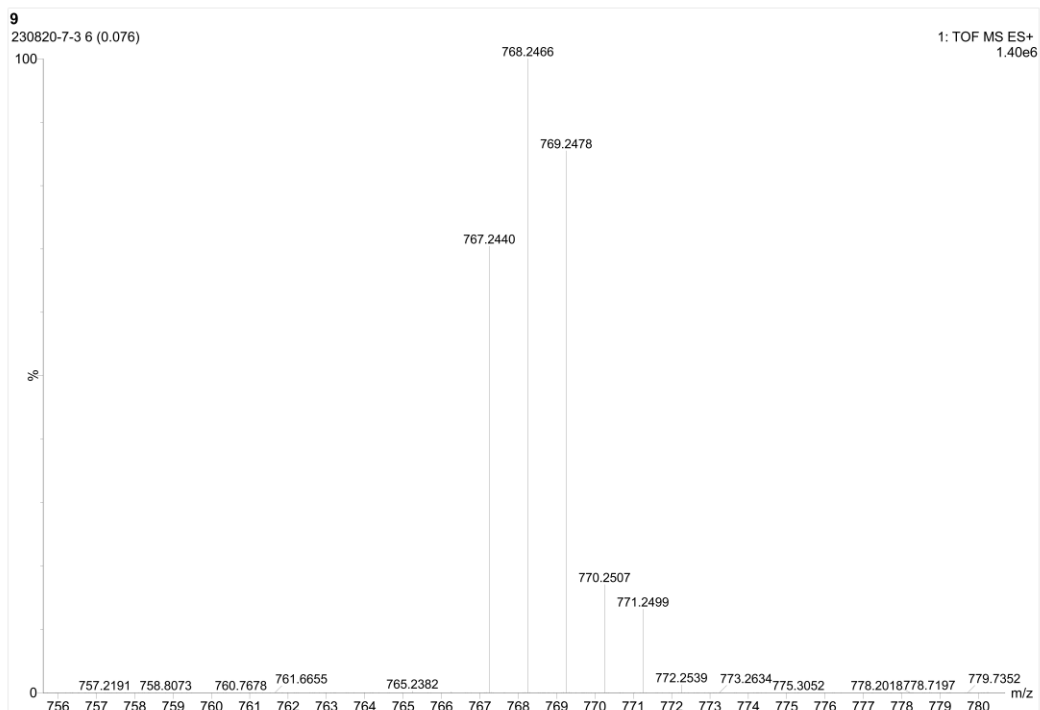

Monoisotopic Mass, Even Electron Ions  
683 formula(e) evaluated with 1 results within limits (up to 50 closest results for each mass)  
Elements Used:  
C: 30-30 H: 41-41 N: 0-100 O: 0-100 Pt: 1-1

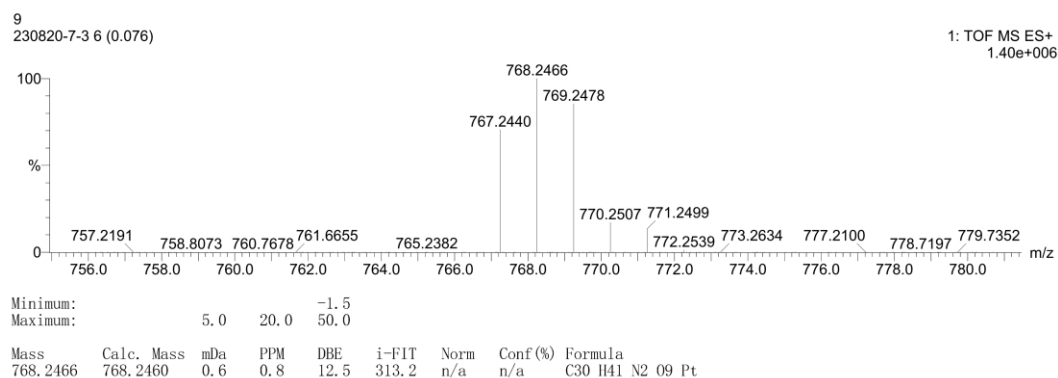

**Figure S13.** HRMS spectrum of **5** in methanol. The measured  $m/z$  is 768.2466 and the calculated  $m/z$  is 768.2460.

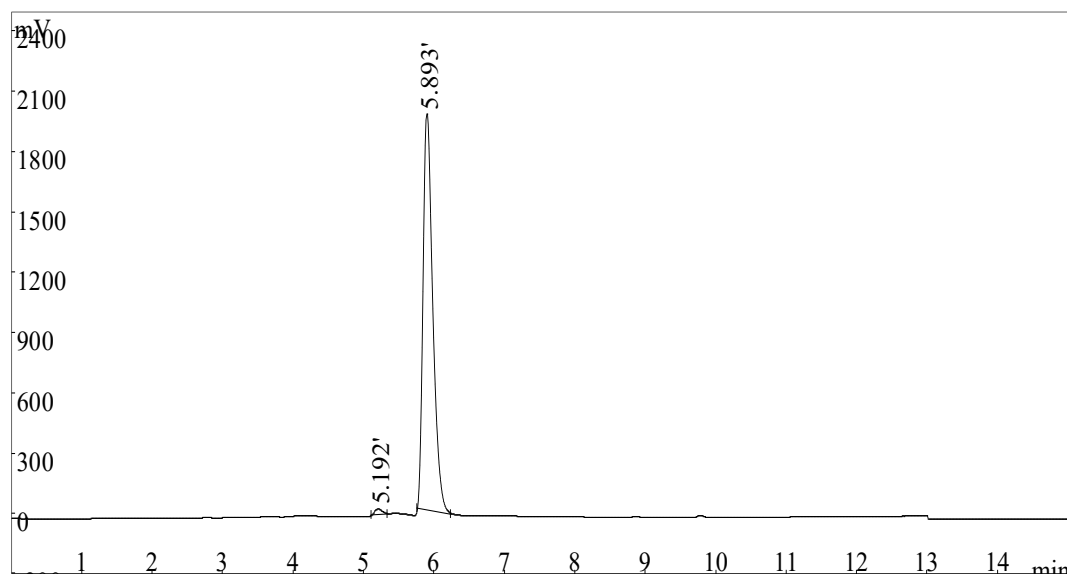

| No. | Retention time | Peak area | Concentration (%) |
|-----|----------------|-----------|-------------------|
| 1   | 5.192          | 186190    | 1.039             |
| 2   | 5.893          | 17739307  | 98.96             |

Figure S14. HPLC characterization of 5.

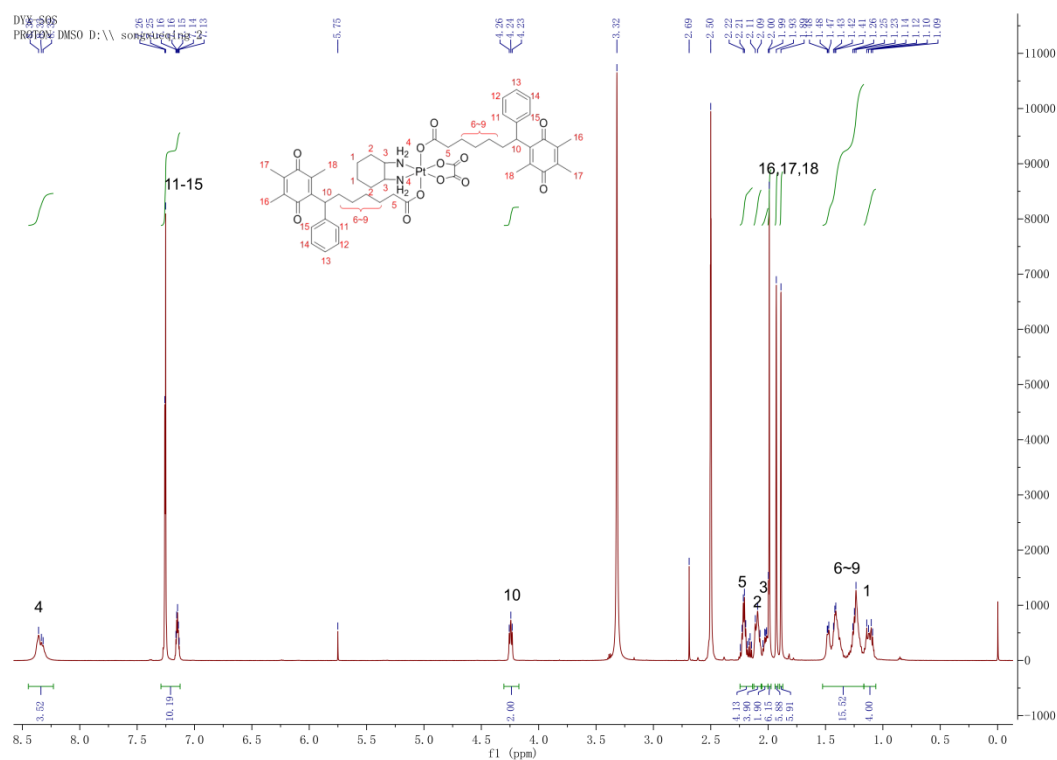

Figure S15.  $^1\text{H-NMR}$  spectrum of 6 in  $\text{DMSO-}d_6$ .

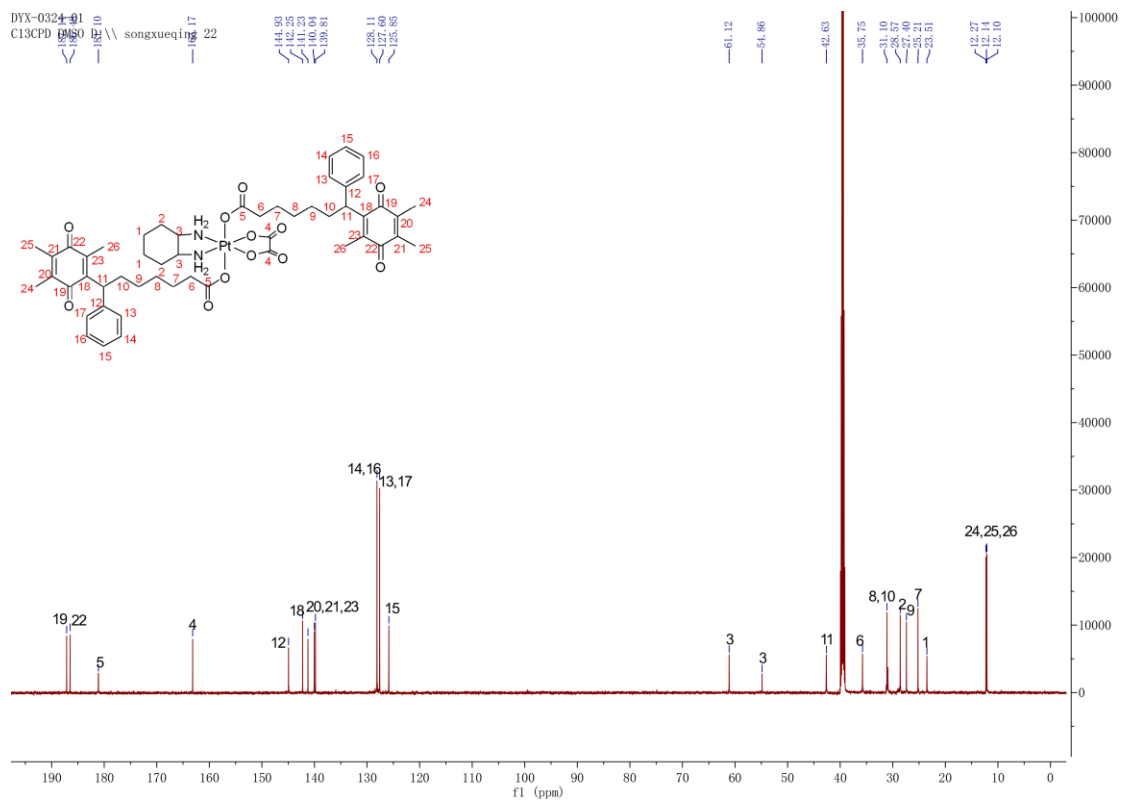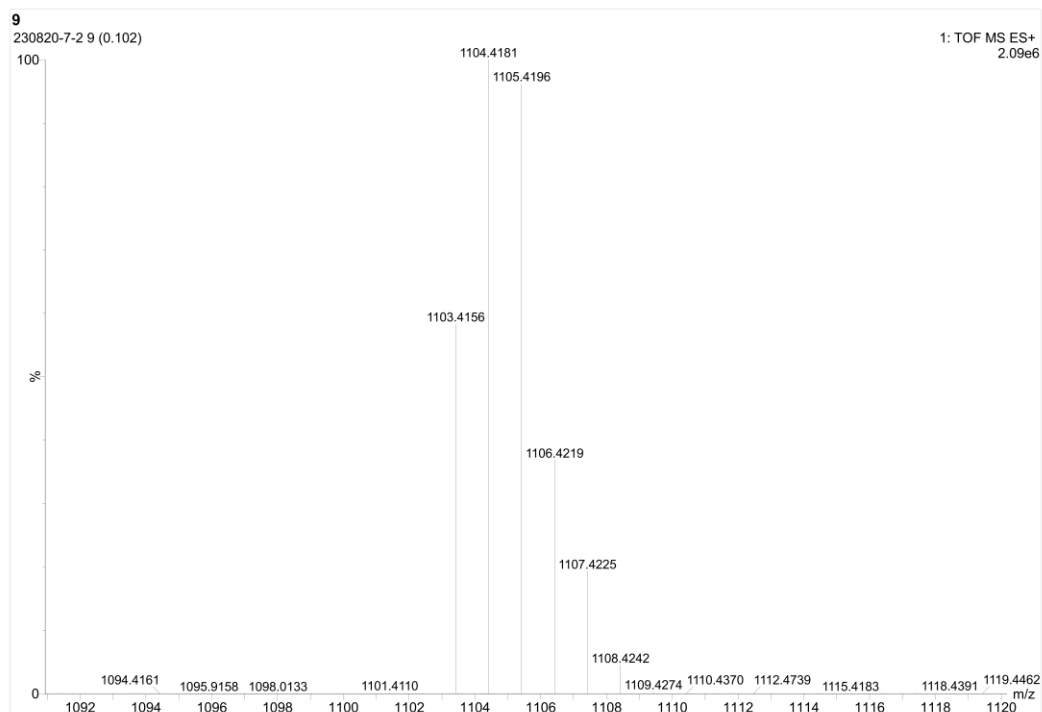

Monoisotopic Mass, Even Electron Ions  
 1732 formula(e) evaluated with 1 results within limits (up to 50 closest results for each mass)  
 Elements Used:  
 C: 52-52 H: 65-65 N: 0-100 O: 0-100 Pt: 1-1

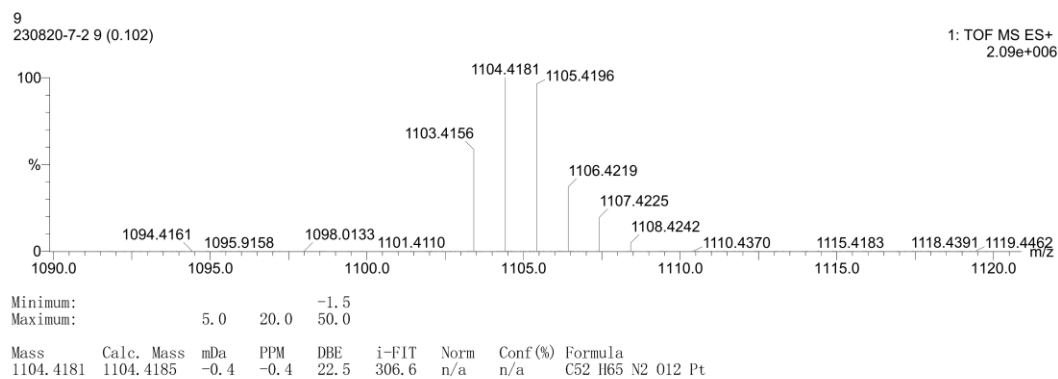

**Figure S17.** HRMS spectrum of **6** in methanol. The measured  $m/z$  is 1104.4181 and the calculated  $m/z$  is 1104.4185.

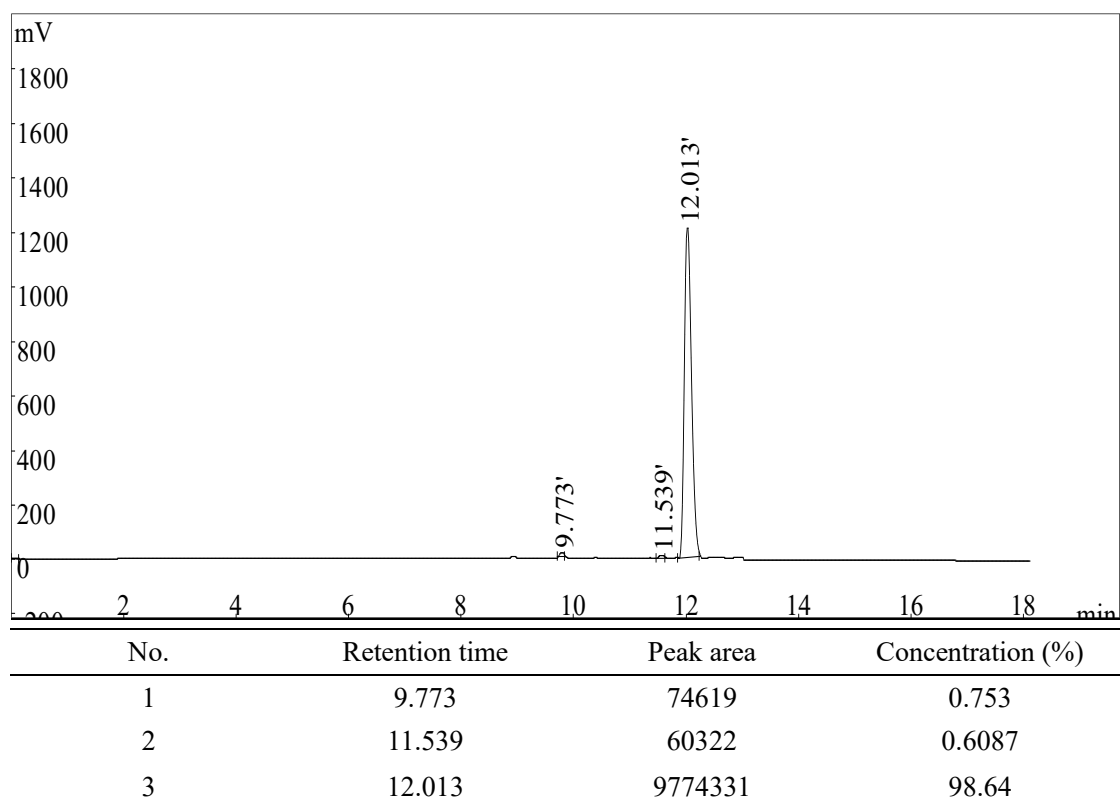

**Figure S18.** HPLC characterization of **6**.

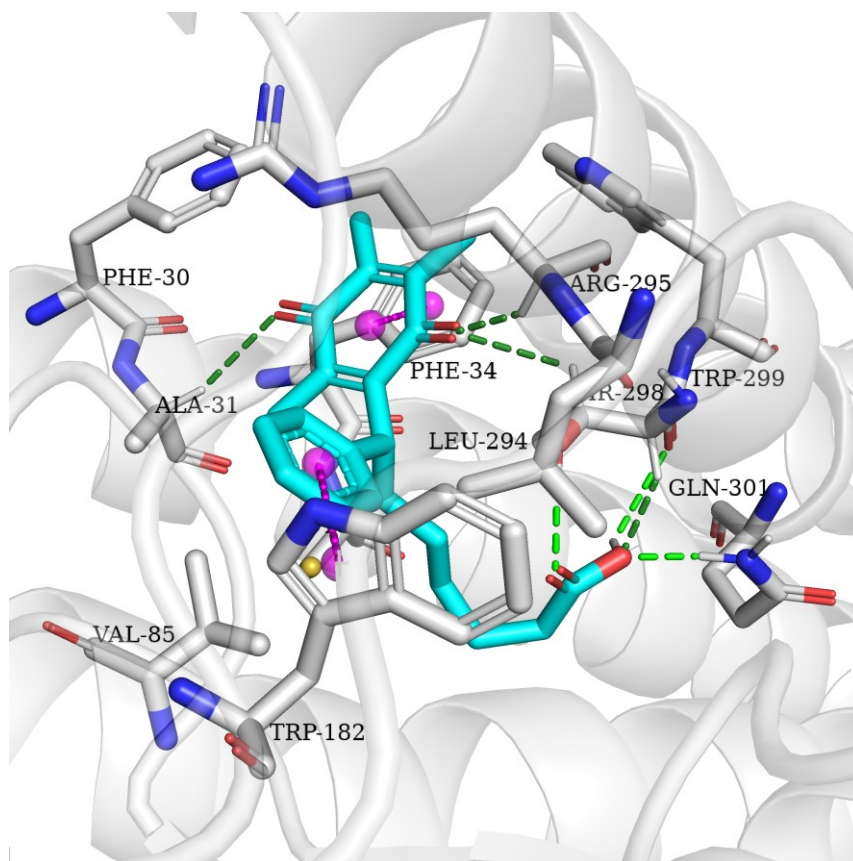

**Figure S19.** The binding modes of SRT with TXA2R. The hydrogen interactions are in green dashed lines, the carbon hydrogen interactions are in forest dashed lines, and the Pi–Pi interactions and Pi–Cation interactions are in magenta dashed line. All the hydrogens are omitted except that on the heavy atoms that can form hydrogen bond interactions. The hydrophobic interactions are not presented.

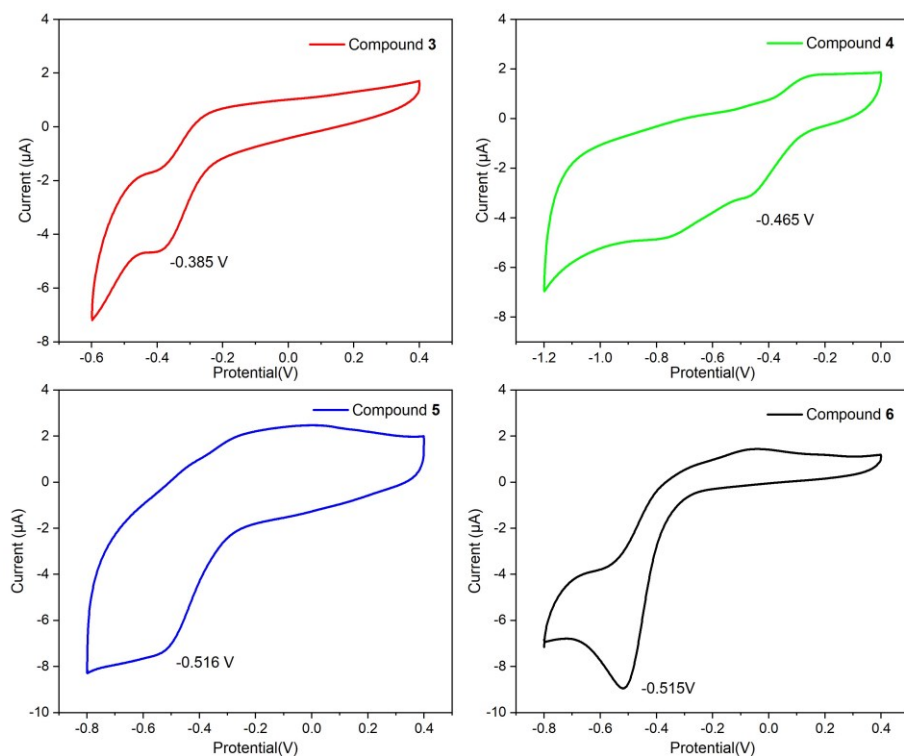

**Figure S20.** Cyclic voltammograms of Pt(IV) complexes **3–6** recorded at a glassy carbon electrode in PBS buffer (DMF : PBS = 1:20, pH = 7.4) containing 0.1 M KCl as supporting electrolyte and 0.1 mM Pt(IV) complex.

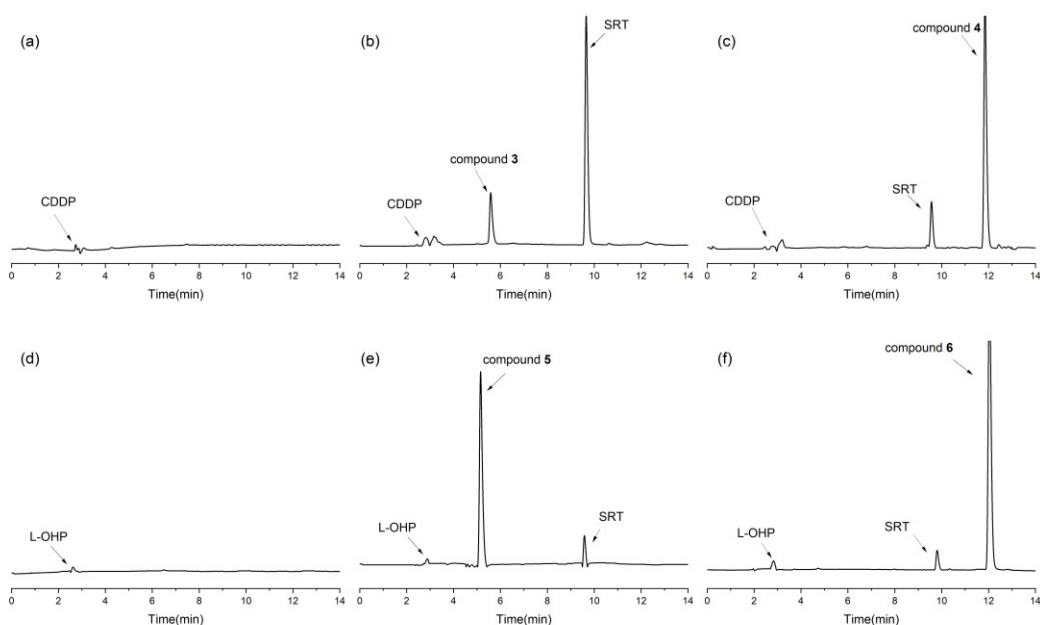

**Figure S21.** The HPLC of CDDP (a) and L-OHP (d) in DMSO. The reduction of compounds **3–6** with GSH in H<sub>2</sub>O at 37°C for 24 h in dark. (b) Compound **3**. (c) Compound **4**. (e) Compound **5**. (f) Compound **6**.



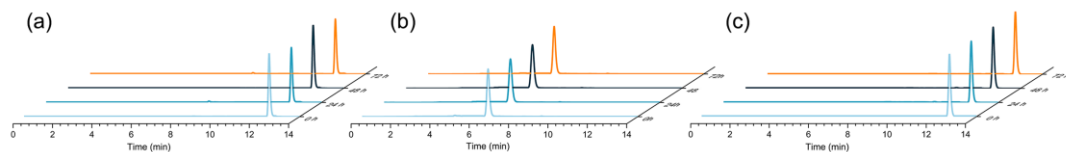

**Figure S22.** Stability of compounds **4–6** at 37°C in PBS/DMF (3:1, v/v, pH 7.4) for 0, 6, 12, 24 and 48 h in the dark. (a) Stability of compound **4**. (b) Stability of compound **5**. (c) Stability of compound **6**.

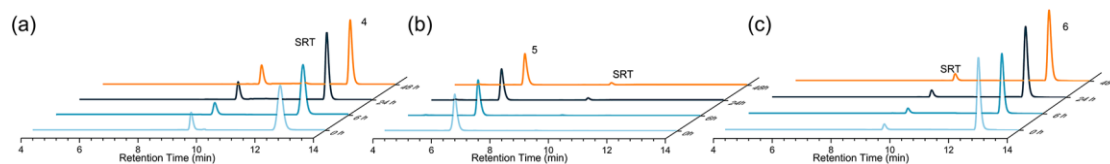

**Figure S23.** Reduction of compounds **4–6** with GSH in PBS at 37°C for 0, 6, 24 and 48 h in the dark. (a) Reduction of compound **4**. (b) Reduction of compound **5**. (c) Reduction of compound **6**.

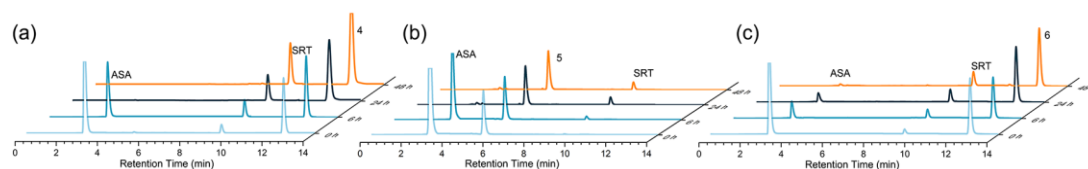

**Figure S24.** Reduction of compounds **4–6** with AsA in PBS at 37°C for 0, 6, 24 and 48 h in the dark. (a) Reduction of compound **4**. (b) Reduction of compound **5**. (c) Reduction of compound **6**.

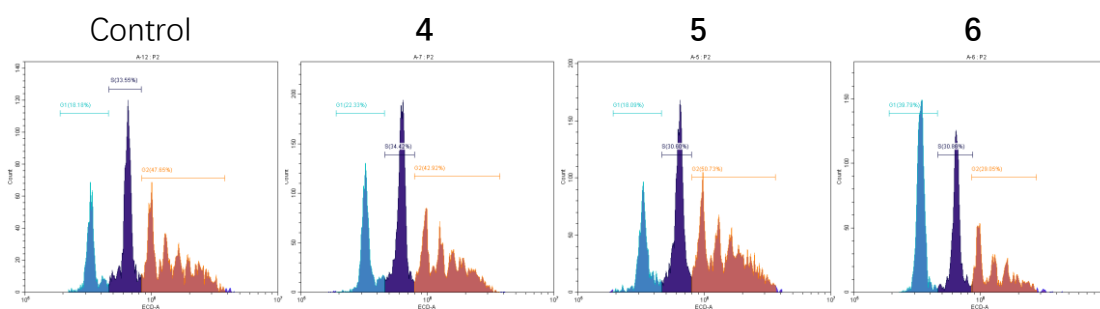

**Figure S25.** DNA contents were detected by flow cytometry.

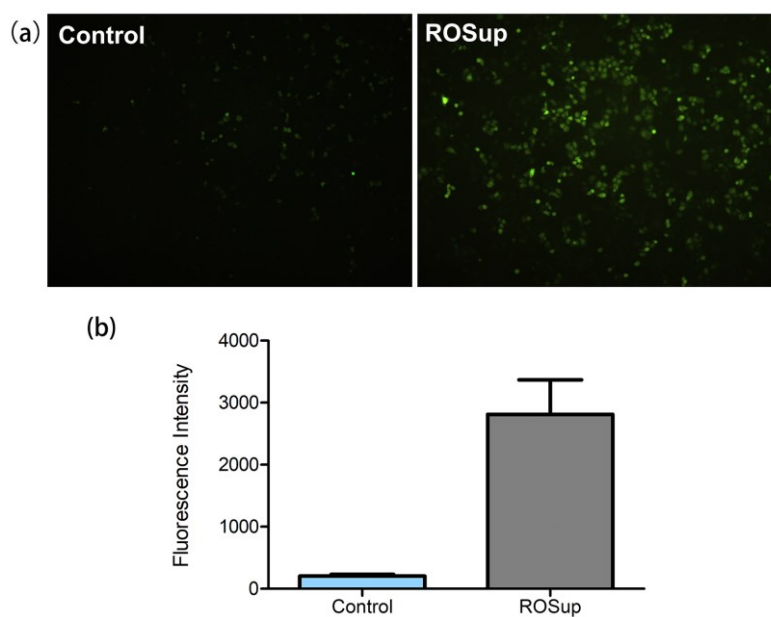

**Figure S26.** (a) Fluorescent images of ROS detected by DFCH-DA probe in control and ROSup. (b) Statistics of fluorescence intensity.

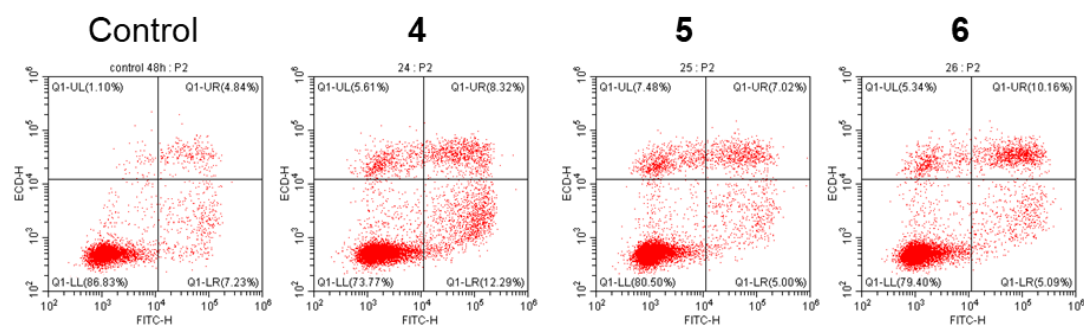

**Figure S27.** Annexin V-FITC/PI double staining detected by flow cytometry (all 5  $\mu\text{M}$ ) for 48 h.

**Table S1.** Effects of compounds on clotting time.

| Compounds      | Dose (mg/mL) | Clotting time (s)   |
|----------------|--------------|---------------------|
| PBS            | -            | 214.00 $\pm$ 7.94   |
| ADP            | 4            | 174.00 $\pm$ 22.34  |
| Ozagrel        | 4            | 331.3 $\pm$ 30.67** |
| SRT            | 4            | 253.00 $\pm$ 39.36  |
| CDDP           | 4            | 233.67 $\pm$ 44.74  |
| Compound 3-I   | 4            | 538.00 $\pm$ 20.42  |
| Compound 3-II  | 0.4          | 308.00 $\pm$ 53.11  |
| Compound 3-III | 0.04         | 241.33 $\pm$ 26.35  |
